# Supplementary material for: The exogenous delivery of microRNA-449b-5p using spermidine-PLGA nanoparticles efficiently decreases hepatic injury
Source: Royal Society of Chemistry journal article supplement (doi:10.1039/c9ra06129k), 2019-01-01
Supplement: c9ra06129k1.pdf [file c9ra06129k1.pdf]

**Supplementary Information**

**Exogenous delivery of MicroRNA-449b-5p using spermidine-PLGA nanoparticles  
efficiently decreases the hepatic injury**

Fengli Hu<sup>1#</sup>, Dongdong Yang<sup>2#</sup>, Bo Qian<sup>1</sup>, Shengjie Fan<sup>1</sup>, Qiankun Zhu<sup>2</sup>, Haiyang Ren<sup>2</sup>,  
Xiaodong Li<sup>2</sup>, Bo Zhai<sup>2\*</sup>

<sup>1</sup>Department of Gastroenterology, The Fourth Affiliated Hospital of Harbin Medical University,  
Nangang District, Harbin, China, 150001

<sup>2</sup>Department of Surgical Oncology and Hepatobiliary Surgery, The Fourth Affiliated Hospital of  
Harbin Medical University, Nangang District, Harbin, China, 150001

#These two authors contribute to this work equally.

**\*Corresponding author:**

Bo Zhai, MD

Department of Surgical Oncology and Hepatobiliary Surgery,

The Fourth Affiliated Hospital of Harbin Medical University,

No. 37, Yiyuan Street, Nangang District, Harbin, China, 150001

Tel/Fax: +86 451 8257 6777

Email: [BernardLindseyfmg@yahoo.com](mailto:BernardLindseyfmg@yahoo.com)

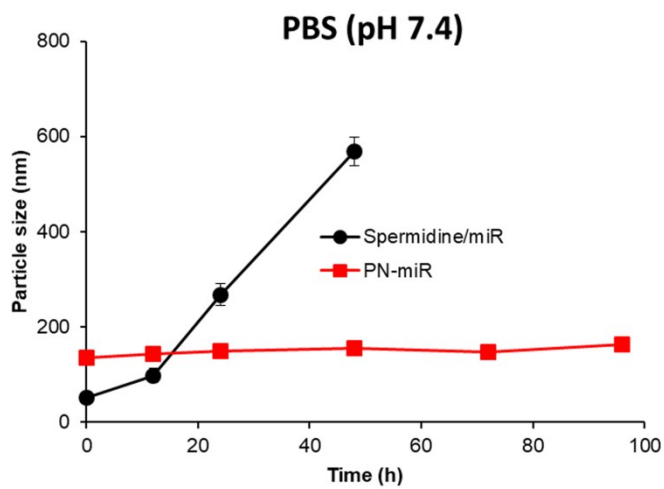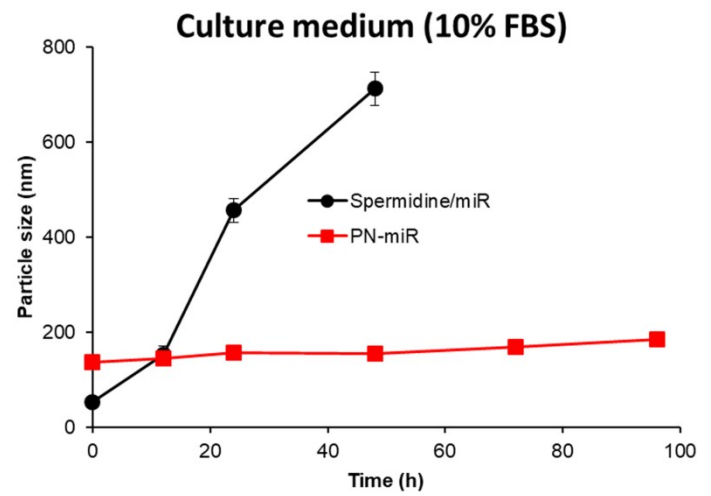

Figure S1: Stability analysis of Spermidine/miR complex and PN-miR nanoparticles in PBS and culture medium conditions. The stability was analyzed in terms of change in particle size.

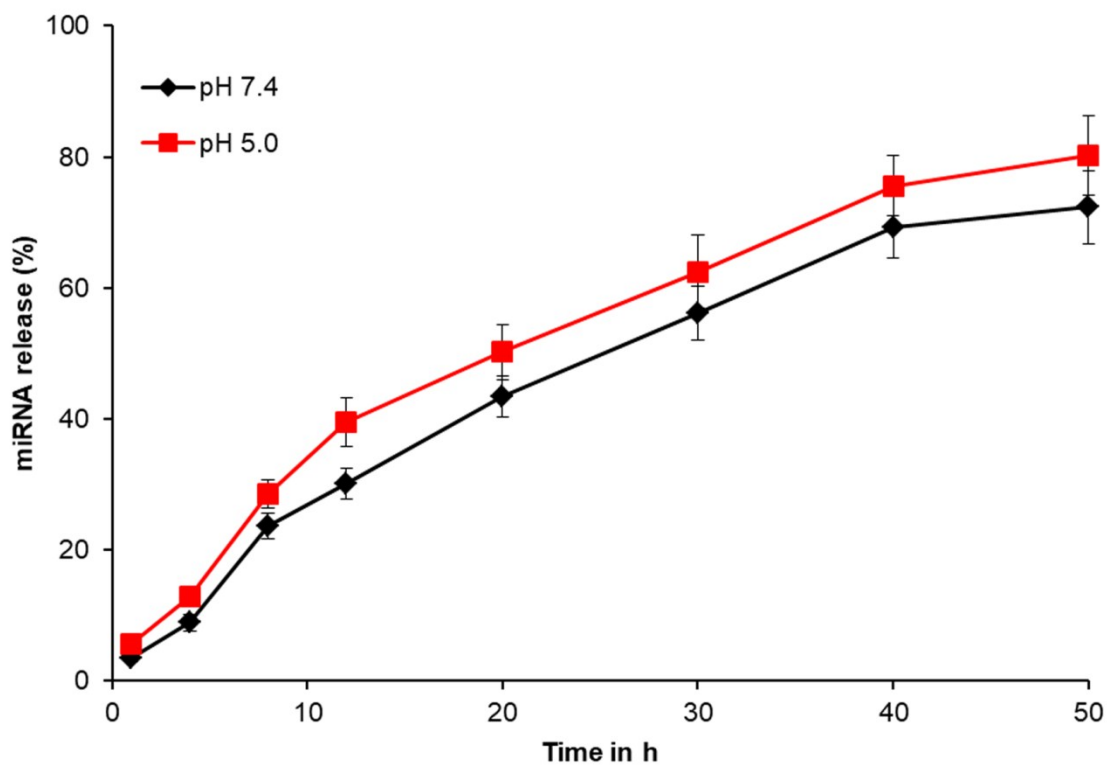

Figure S2: In vitro miRNA release from PN-miR nanoparticles under pH 7.4 and pH 5.0 buffer conditions. FAM-miRNA was used to determine the release kinetics of miRNA under specified pH conditions.
